# Supplementary material
Source: Frontiers journal article supplement (https://www.frontiersin.org/articles/416740)
Supplement: Table_4.pdf [file Table_4.pdf]

Supplementary Table 4:

|        |         |                 | ApoE  |       |       | Total  |
|--------|---------|-----------------|-------|-------|-------|--------|
|        |         |                 | 3/3   | 2/4   | 3/4   |        |
| Status | Healthy | Count           | 15    | 2     | 3     | 20     |
|        |         | % within status | 75.0% | 10.0% | 15.0% | 100.0% |
|        | Frailty | Count           | 30    | 3     | 4     | 37     |
|        |         | % within status | 81.1% | 8.1%  | 10.8% | 100.0% |
| Total  |         | Count           | 45    | 5     | 7     | 57     |
|        |         | % within status | 78.9% | 8.8%  | 12.3% | 100.0% |

Supplementary Table 4: No relationship was found between ApoE allele genotype and healthy ageing status.
