# Supplementary material
Source: Frontiers journal article supplement (https://www.frontiersin.org/articles/416740)
Supplement: Table_5.pdf [file Table_5.pdf]

Supplementary Table 5:

**Distribution of participants with/without anti-A $\beta$ 40 antibodies**

|                          | <b>Anti-A<math>\beta</math>40 antibody<br/>negative participants</b> | <b>Anti-A<math>\beta</math>40 antibody<br/>positive participants</b> | Total | <b>% Anti-A<math>\beta</math>40<br/>antibody positive</b> |
|--------------------------|----------------------------------------------------------------------|----------------------------------------------------------------------|-------|-----------------------------------------------------------|
| Functionally<br>impaired | 28                                                                   | 10                                                                   | 38    | 26.3                                                      |
| Healthy                  | 14                                                                   | 6                                                                    | 20    | 30                                                        |
| Total                    | 42                                                                   | 16                                                                   | 58    | 27.6                                                      |

p=0.765

**Distribution of participants with/without anti-A $\beta$ 42 antibodies**

|                          | <b>Anti-A<math>\beta</math>42 antibody<br/>negative<br/>participants</b> | <b>Anti-A<math>\beta</math>42 antibody<br/>positive participants</b> | Total | <b>% Anti-A<math>\beta</math>42<br/>antibody positive</b> |
|--------------------------|--------------------------------------------------------------------------|----------------------------------------------------------------------|-------|-----------------------------------------------------------|
| Functionally<br>impaired | 21                                                                       | 17                                                                   | 38    | 44.7                                                      |
| Healthy                  | 11                                                                       | 9                                                                    | 20    | 45                                                        |
| Total                    | 32                                                                       | 26                                                                   | 58    | 44.8                                                      |

p=0.985

**Supplementary Table 5:** Chi-Square test showed no significant differences in the distribution of individuals with or without anti-A $\beta$ 40 (p=0.765) or A $\beta$ 42 (p=0.985) antibodies between functionally impaired and healthy groups.
